# Supplementary material for: The emergence of the Gulf Stream and interior western boundary as key regions to constrain the future North Atlantic carbon uptake
Source: Copernicus journal article supplement (doi:10.5194/gmd-16-2095-2023), 2023-04-18
Supplement: Supplementary file 1 [file gmd-16-2095-2023-supplement.pdf]

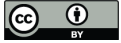

*Supplement of*

## **The emergence of the Gulf Stream and interior western boundary as key regions to constrain the future North Atlantic carbon uptake**

**Nadine Goris et al.**

*Correspondence to:* Nadine Goris ([nadine.goris@norceresearch.no](mailto:nadine.goris@norceresearch.no))

The copyright of individual parts of the supplement might differ from the article licence.

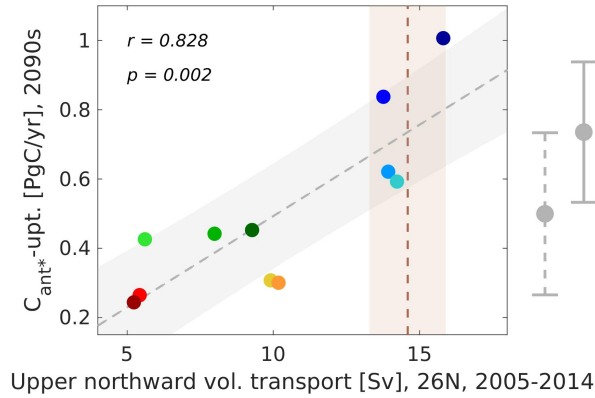

**Figure S1.** Emergent constraint between upper ocean northward volume transport accumulated between surface and 500 m depth for the years 2005-2014 (predictor) and the future North Atlantic  $C_{ant^*}$  uptake (predictand) for the years 2090-2099 for our model ensemble. Shown are scatter-plot (color coding of models as in Fig. 1 of the main article), best fit linear regression (gray line) including the interval of the 68% projection uncertainty (gray shading), cross-correlation between simulated predictor and predictand as well as mean observational constraint and its uncertainty (dashed brown lines and light-brown shading). Associated estimates for the unconstrained model ensemble (dashed gray bar) and the emergent constraint (gray bar) are shown on the right side of the panels. See Appendix A of the main article for a detailed description of the considered observational estimate.

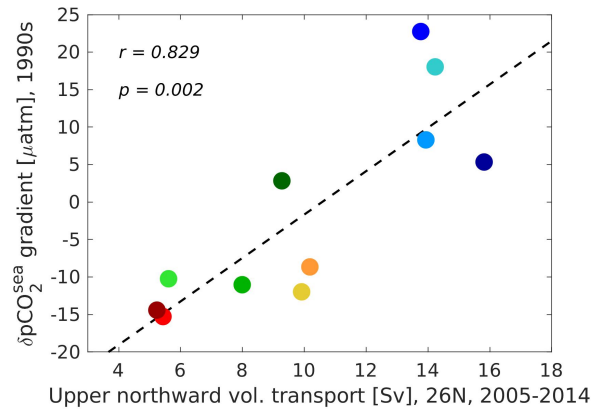

**Figure S2.** Relationship between (i) upper-ocean northward volume transport accumulated between surface and 500 m depth for the years 2005-2014 and (ii) the northward propagation of the winter  $pCO_2^{sea}$  anomaly for the years 1990-1999, here expressed as the difference between winter  $pCO_2^{sea}$ -anomalies for latitudes 26°-28°N and latitudes 40°-42°N. Shown are scatter-plot (color coding of models as in Fig. 1 of the main article), best fit linear regression (dashed black line) and cross-correlation between both quantities.

### Multi-model mean, $C_{ant^*}$ -fraction, 1997-2007

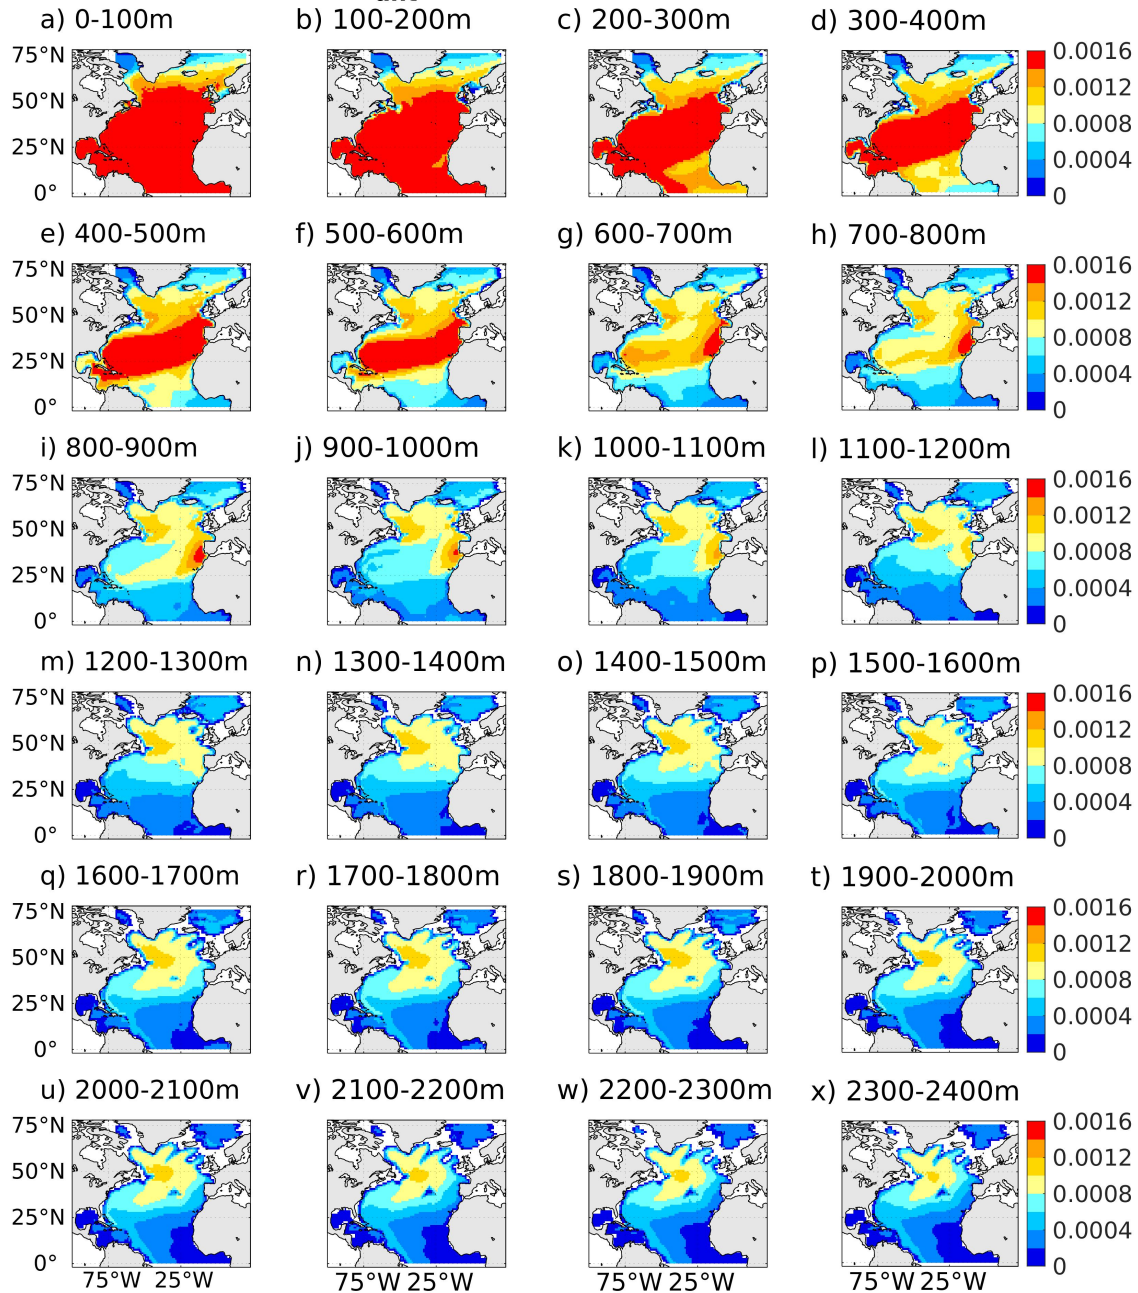

**Figure S3.** Contemporary fraction of the North Atlantic  $C_{ant^*}$  multi-model mean for our considered model ensemble. Panels (a-x) displays results for different depth planes between surface and 2400m.

### Multi-model mean, $C_{ant^*}$ -fraction, 1997-2007

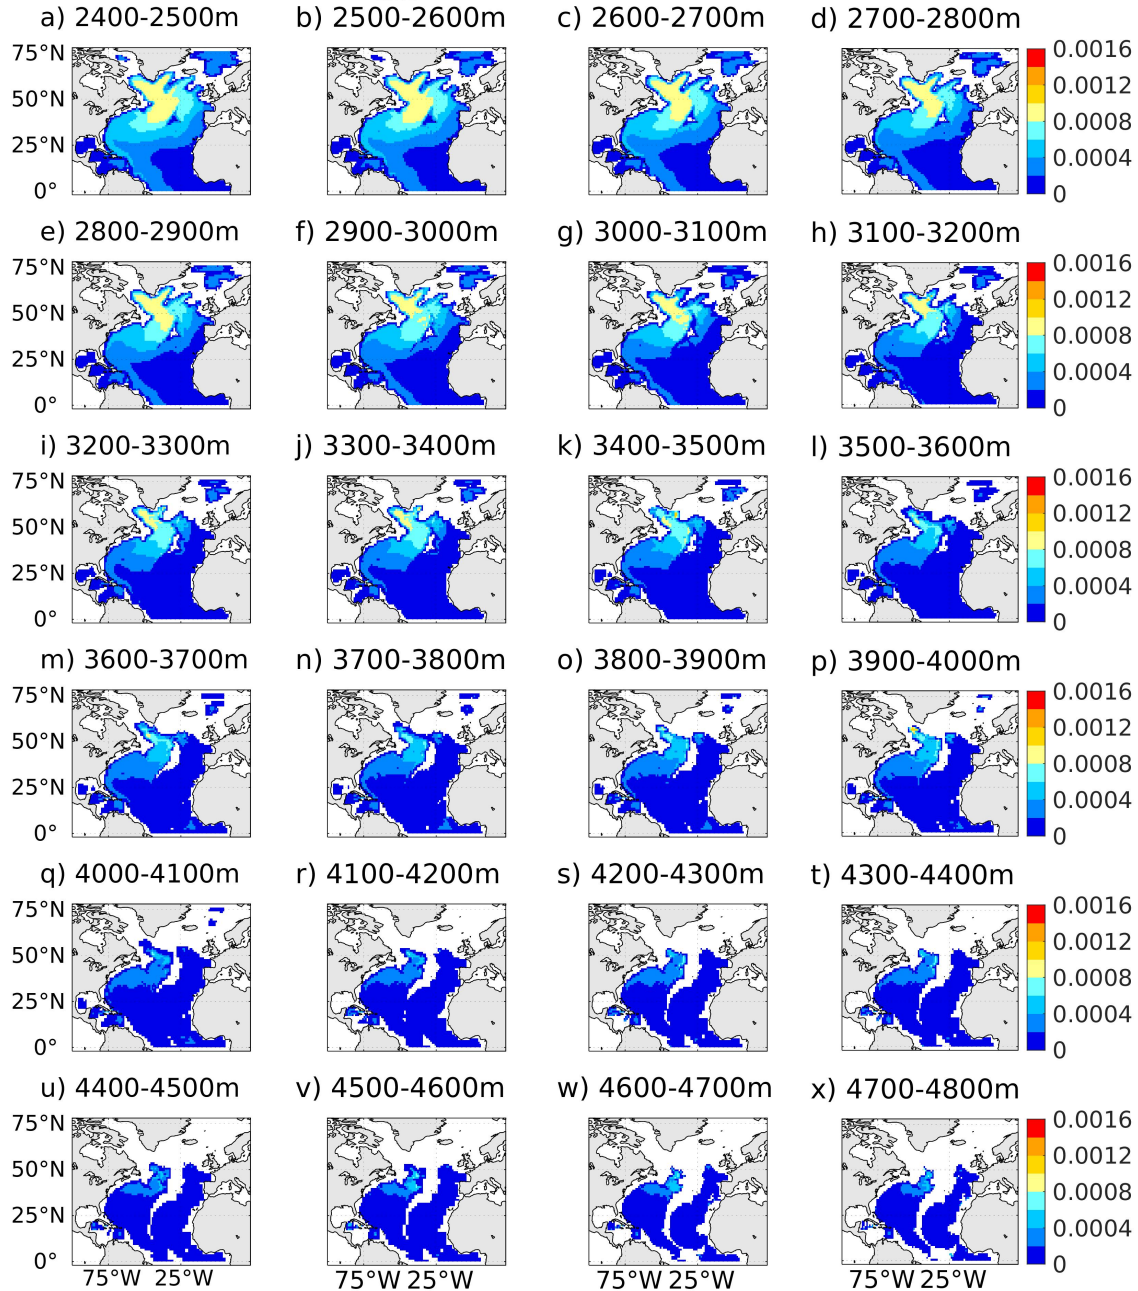

**Figure S4.** Contemporary fraction of the North Atlantic  $C_{ant^*}$  multi-model mean for our considered model ensemble. Panels (a-x) displays results for different depth planes between 2400m and 4800m.

### Multi-model standard deviation, $C_{ant^*}$ -fraction, 1997-2007

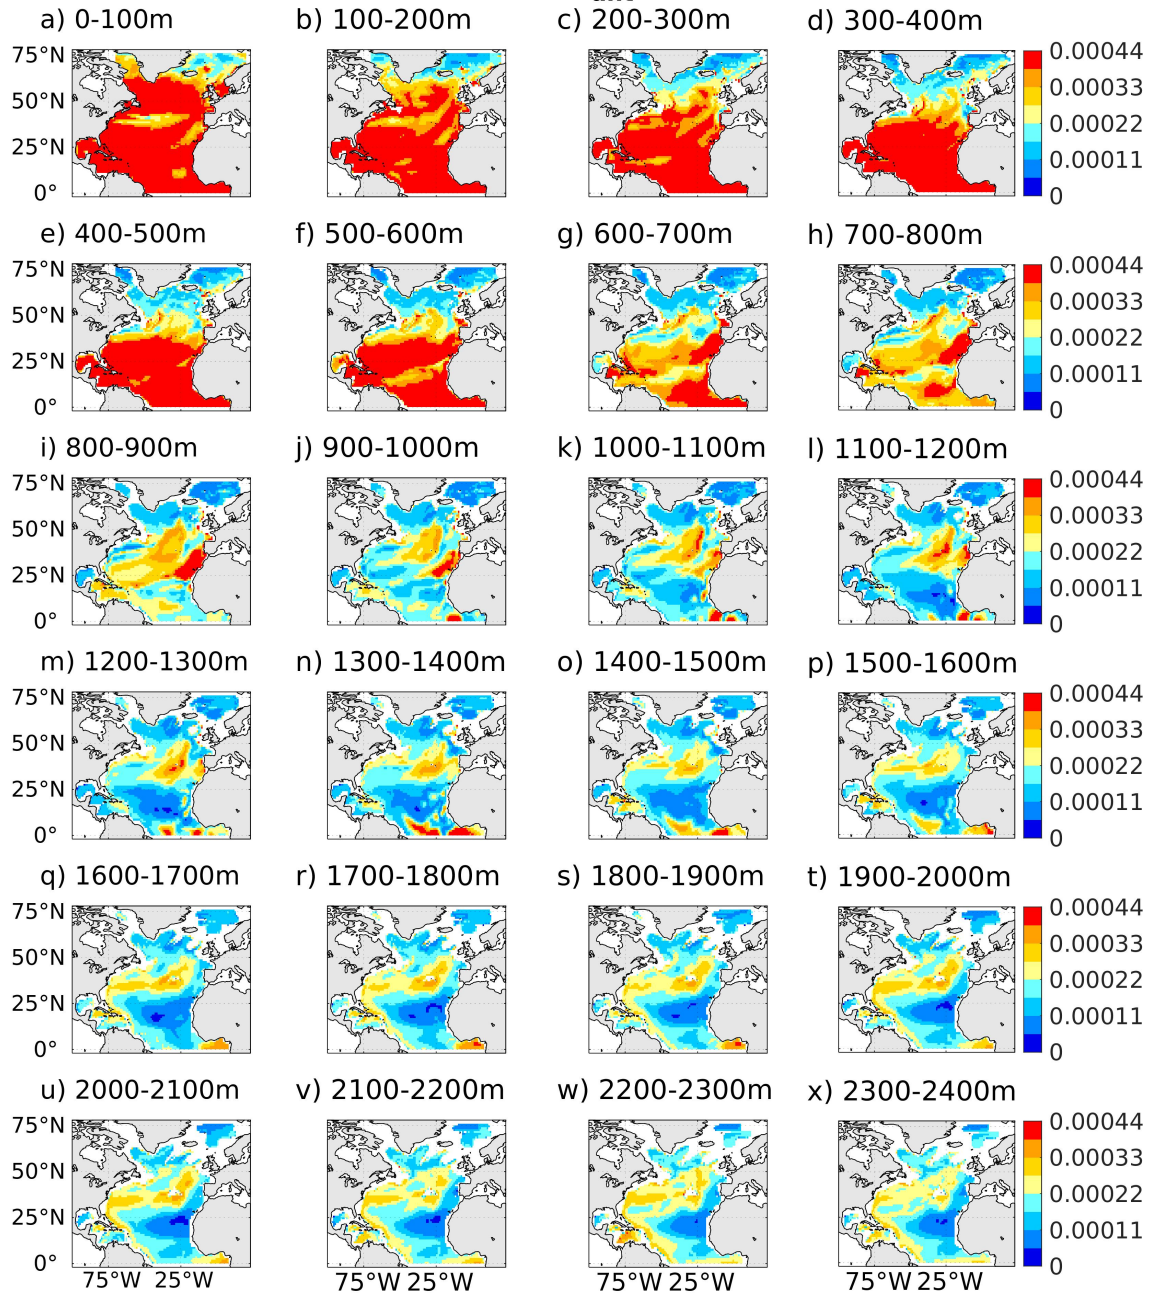

**Figure S5.** Contemporary fraction of the North Atlantic  $C_{ant^*}$  multi-model standard deviation for our considered model ensemble. Panels (a-x) displays results for different depth planes between surface and 2400m. Non-eligible points are colored in different shades of blue.

### Multi-model standard deviation, $C_{ant^*}$ -fraction, 1997-2007

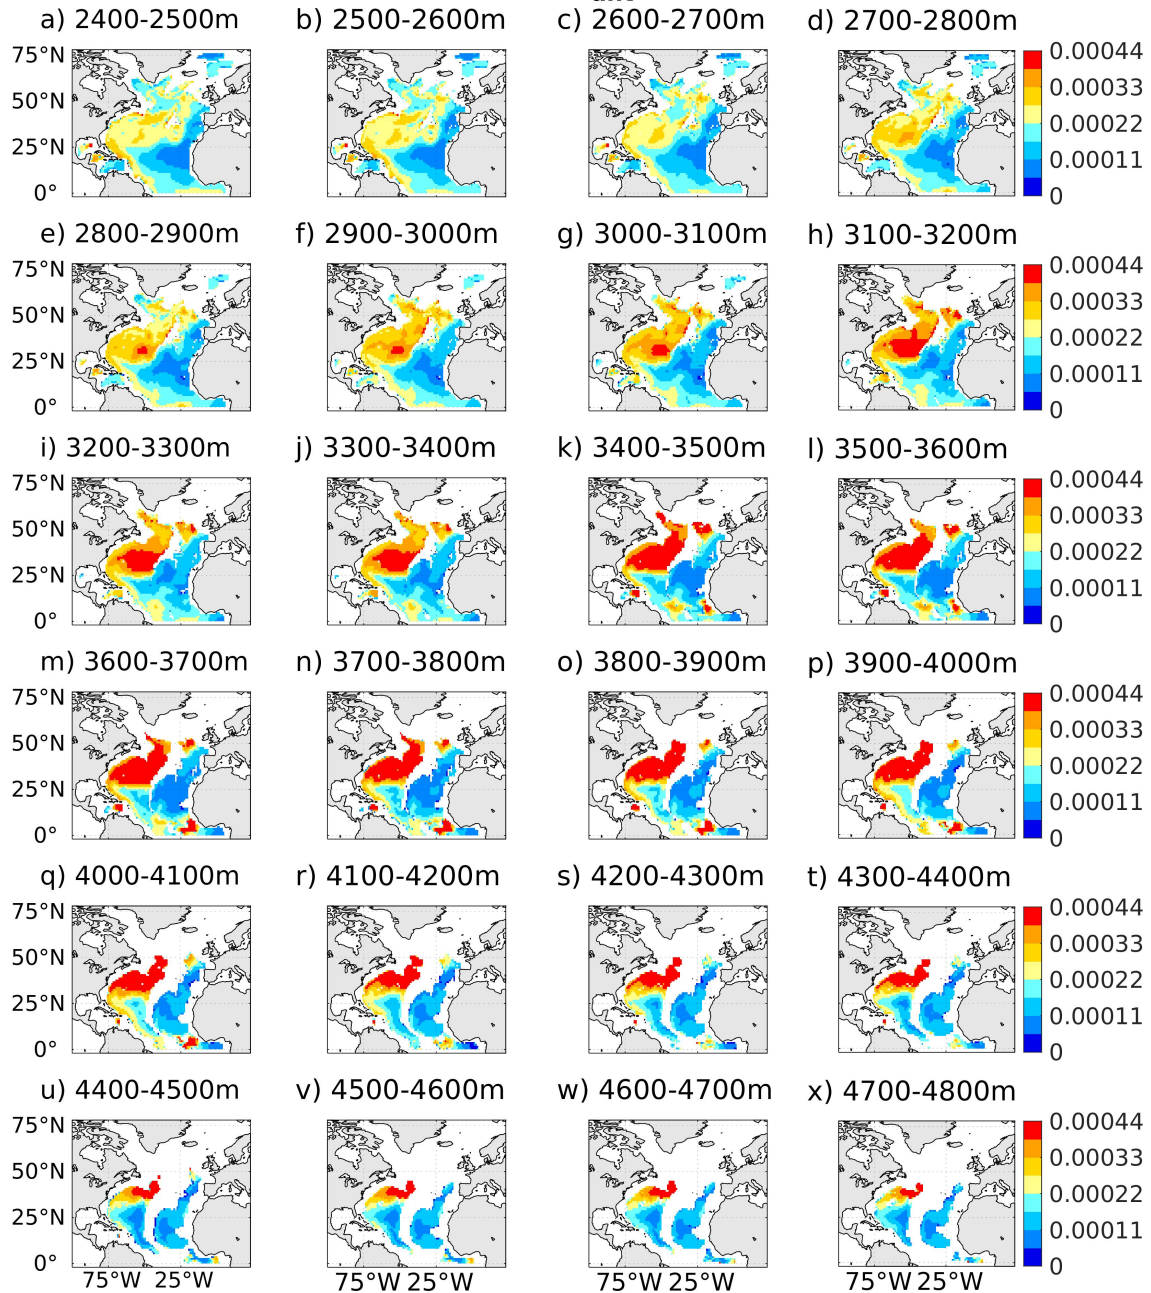

**Figure S6.** Contemporary fraction of the North Atlantic  $C_{ant^*}$  multi-model standard deviation for our considered model ensemble. Panels (a-x) displays results for different depth planes between 2400m and 4800m. Non-eligible points are colored in different shades of blue.

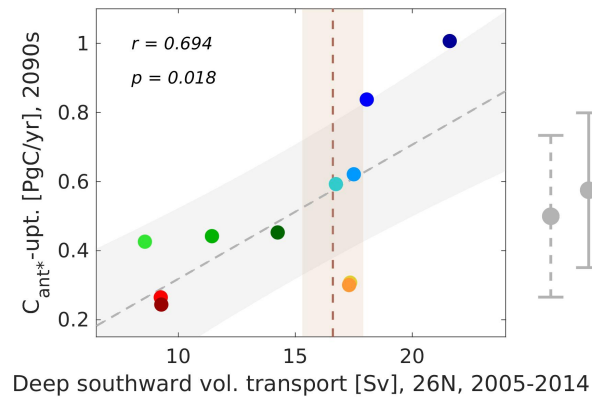

**Figure S7.** Emergent constraint between interior-ocean southward volume transport accumulated between 700 m and 4700 m depth for the years 2005-2014 (predictor) and the future North Atlantic  $C_{ant*}$  uptake (predictand) for the years 2090-2099 for our model ensemble. Shown are scatter-plot (color coding of models as in Fig. 1 of the main article), best fit linear regression (gray line) including the interval of the 68% projection uncertainty (gray shading), cross-correlation between simulated predictor and predictand as well as mean observational constraint and its uncertainty (dashed brown lines and light-brown shading). Associated estimates for the unconstrained model ensemble (dashed gray bar) and the emergent constraint (gray bar) are shown on the right side of the panels. See Appendix A of the main article for a detailed description of the considered observational estimate.
